# Supplementary material for: The Effect of the Number of Eating Out on Metabolic Syndrome and the Moderating Effect of Health Behavior in Korean
Source: Research Square preprint supplement (doi:10.21203/rs.3.rs-2221273/v1), 2022-11-29
Supplement: Supplementary file 1 [file 02020a632f89a0f238515b34.docx]

<Table 1> Operational definition of study variables

| **Variables** | | | **Operational definition** | |
| --- | --- | --- | --- | --- |
| Dependent  variable | Metabolic  syndrome | | Waist circumference:  ≥ 90㎝(men), ≥ 85㎝(women)  Triglycerides;≥150mg/dL  HDL-C:< 40mg/dL(men),  < 50mg/dL(women)  Blood pressure:≥130/85mmHg or  hypertension Rx  Glucose :≥100mg/dL  (includes diabetes)  ->Calculate the number of factors (0-5 points) for each individual  ->More than any 3 of the following  5 factors | |
| Independent  variable | Number of  eating out | | Hardly (less than once a month)(0 point)  1~3 times per month (1 point)  1~2 times a week (2 point)  3~4 times a week (3 point)  5~6 times a week (4 point)  Once a day (5 point)  More than twice a day (6 point) | |
| Moderating  variable | Health  behavior | smoking | Never smoked (0 point)  Less than 5 packs(100 pieces) (1 point)  More than 5 packs(100 pieces) (2 point) | |
| drinking | Do not drink for a year (0 point)  Less than once a month (1 point)  About once a month (2 point)  2~4 times a month(3 point)  2~3 times a week (4 point)  More than 4 times a week (5 point) | |
| Stress  Recog-  nition  rate | Very much felt (0 point)  a lot felt(1 point)(1 point)  a little bit felt(2 point)  Hardly felt (3 point) | |
| Control  variable | family  history | high blood pressure | | One of parent  diagnosed by a doctor -> Yes/N0 |
| hyperlipidemia | | Yes/N0 |
| ischemic heart disease | | Yes/N0 |
| stroke | | Yes/N0 |
| diabetes | | Yes/N0 |

<Table 2> Sociodemographic Characteristics of Study Subjects

| Variable | | Categories | Frequency (n) | Percentage (%) |
| --- | --- | --- | --- | --- |
| Gender | | Men  Women | 2230  2976 | 42.8  57.2 |
| Age | | under 30s  30s  40s  50s  60s  over 70s | 590  749  951  968  955  993 | 11.3  14.4  18.3  18.6  18.3  19.1 |
| Number of families | | 1  2  3  over 4 | 688  1723  1279  1516 | 13.2  33.1  24.6  29.1 |
| Marital status | | Married  Unmarried | 4361  845 | 83.8  16.2 |
| Education level | | Elementary school  Middle school  High school  2/3year university  4year university  Guitar | 666  498  1381  710  1313  638 | 12.8  9.6  26.5  13.6  25.2  12.3 |
| Family  History | High Blood  pressure | NO  YES | 3321  1885 | 63.8  36.2 |
| Hyperlipidemia | NO  YES | 4877  329 | 93.7  6.3 |
| Ischemic heart  disease | NO  YES | 4914  292 | 94.4  5.6 |
| Stroke | NO  YES | 4634  572 | 89.0  11.0 |
| Diabetes | NO  YES | 4247  959 | 81.6  18.4 |
| Total | |  | 5206 | 100.0 |

<Table 3> Metabolic syndrome variations according to sociodemographic characteristics

|  | | | Metabolic syndrome | | |
| --- | --- | --- | --- | --- | --- |
| Variable | | | M±SD | t/F | p |
| Gender | | Men | 2.84±2.310 | 4.629 | <.001 |
| Women | 2.61±2.277 |
| Age | | under 30s | 4.32±2.556e | 455.469 | <.001 |
| 30s | 1.56±1.942a |
| 40s | 1.64±1.782a |
| 50s | 1.99±1.768b |
| 60s | 2.39±1.692c |
| over 70s | 2.70±1.705d |
| Number of  families | | 1 | 2.06±1.709a | 116.731 | <.001 |
| 2 | 2.27±1.874b |
| 3 | 2.61±2.319c |
| over 4 | 3.27±2.550d |
| Marital status | | Married | 2.08±1.820 | -38.527 | <.001 |
| Unmarried | 4.00±2.604 |
| Education Level | | Elementary school | 2.83±1.752d | 717.591 | <.001 |
| Middle school | 3.23±2.112e |
| High school | 2.20±1.967c |
| 2/3year university | 1.37±1.568b |
| 4year university | 1.21±1.531a |
| Guitar | 4.54±2.196f |
| Family  History | High Blood  pressure | NO | 3.05±2.393 | 23.433 | <.001 |
| YES | 1.91±1.804 |
| Hyper-  lipidemia | NO | 2.76±2.301 | 7.478 | <.01 |
| YES | 1.99±2.072 |
| Ischemic  heart  disease | NO | 2.76±2.311 | 11.378 | <.001 |
| YES | 1.73±1.625 |
| Stroke | NO | 2.78±2.338 | 11.129 | <.001 |
| YES | 2.03±1.598 |
| Diabetes | NO | 2.85±2.342 | 15.481 | <.001 |
| YES | 1.94±1.821 |
| Post-hoc analysis : a<b<c<d<e<f | | | | | |

<Table 4> Correlation between study variales

|  | | Metabolic syndrome | Number of eating out | Health behaviors | | |
| --- | --- | --- | --- | --- | --- | --- |
| Smoking | Drinking | Stress  recognition rate |
| Metabolic syndrome | | 1 |  |  |  |  |
| Number of eating out | | .096** | 1 |  |  |  |
| Heal  th  behavi  or | Smoking | -.253** | .062** | 1 |  |  |
| Drinking | -.091** | .077** | .284** | 1 |  |
| Stress  recognition rate | -.361** | .006** | .179** | .029** | 1 |
| **p<01 | | | | | | |

<Table 5> The Effect of the Number of Eating Out on Metabolic Syndrome

| Variable  (reference value) | B | S.E. | β | t | p |
| --- | --- | --- | --- | --- | --- |
| Constant variable | 4.655 | 1.26 |  | 37.054 | <.001 |
| Gender(Women=0) |  |  |  |  |  |
| Men | .110 | .040 | .024 | 2.739 | <.001 |
| Age(over 70s=0) |  |  |  |  |  |
| under 30s | .618 | .119 | .122 | 5.201 | <.001 |
| 30s | -.475 | .094 | -.068 | -5.033 | <.001 |
| 40s | -.461 | .089 | -.071 | -5.159 | <.001 |
| 50s | -.230 | .082 | -.036 | -2.820 | .005 |
| 60s | -.066 | .074 | -.010 | -.891 | .373 |
| Number of families (over 4=0) | |  |  |  |  |
| 1 | -.845 | .076 | -.112 | -11.098 | <.001 |
| 2 | -.487 | .057 | -.094 | -8.561 | <.001 |
| 3 | -.210 | .051 | -.040 | -4.102 | <.001 |
| Marital status(Unmarried=0) | |  |  |  |  |
| Married | -.687 | .087 | -.141 | -7.914 | <.001 |
| Education(Guitar=0) |  |  |  |  |  |
| Elementary school | -.814 | .079 | -.107 | -10.339 | <.001 |
| Middle school | -.833 | .074 | -.108 | -11.222 | <.001 |
| High school | -1.668 | .059 | -.305 | -28.375 | <.001 |
| 2/3year university | -2.509 | .074 | -.337 | -33.715 | <.001 |
| 4year university | -2.756 | .062 | -.476 | -44.450 | <.001 |
| Family History |  |  |  |  |  |
| High Blood pressure(NO=0) |
| YES | -.257 | .047 | -.051 | -5.461 | <.001 |
| Hyperlipidemia(NO=0) |  |  |  |  |  |
| YES | .028 | .089 | .003 | .317 | .751 |
| Ischemic heart disease(NO=0) | |  |  |  |  |
| YES | -.048 | .097 | -.004 | -.489 | .625 |
| Stroke(NO=0) |  |  |  |  |  |
| YES | .015 | .073 | .002 | .201 | .841 |
| Diabetes(NO=0) |  |  |  |  |  |
| YES | .099 | .058 | .015 | 1.715 | .086 |
| **Number of eating out** | .041 | .011 | .036 | 3.734 | <.001 |
| F=286.370(p<.001), R2=.426, adjR2=.425, D-W=1.857 | | | | | |

<Table 6> Moderating Effect of Smoking

|  | B | SE | t | | p | | 95% Confidence interval | | | |
| --- | --- | --- | --- | --- | --- | --- | --- | --- | --- | --- |
| LLCI | | ULCI | | |
| (Constant variable) | 4.5586 | .1280 | | 35.6088 | | <0.01 | | 4.3076 | | 4.8095 | |
| Gender(Women=0) |  |  | |  | |  | |  | |  | |
| Men | .3470 | .0473 | | 7.3320 | | <0.01 | | .2542 | | .4398 | |
| Age(over 70s=0) |  |  | |  | |  | |  | |  | |
| under 30s | .5309 | .1184 | | 4.4827 | | <0.01 | | .2988 | | .7631 | |
| 30s | -.4746 | .0940 | | -5.0513 | | <0.01 | | -.6588 | | -.2904 | |
| 40s | -.4453 | .0889 | | -5.0119 | | <0.01 | | -.6195 | | -.2712 | |
| 50s | -.2363 | .0812 | | -2.9115 | | <0.1 | | -.3954 | | -.0772 | |
| 60s | -.0579 | .0732 | | -.7906 | |  | | -.2014 | | .0856 | |
| Number of families(over 4=0) | | | |  | |  | |  | |  | |
| 1 | -.7631 | .0762 | | -10.0105 | | <0.01 | | -.9125 | | -.6137 | |
| 2 | -.4505 | .0567 | | -7.9417 | | <0.01 | | -.5618 | | -.3393 | |
| 3 | -.1969 | .0511 | | -3.8565 | | <0.01 | | -.2970 | | -.0968 | |
| Marital status(Unmarried=0) | | | |  | |  | |  | |  | |
| Married | -.6517 | .0865 | | -7.5368 | | <0.01 | | -.8212 | | -.4822 | |
| Education(Guitar=0) | | | |  | |  | |  | |  | |
| Elementary school | -.7742 | .0784 | | -9.8724 | | <0.01 | | -.9279 | | -.6205 | |
| Middle school | -.7784 | .0740 | | -10.5131 | | <0.01 | | -.9235 | | -.6332 | |
| High school | -.1579 | .0593 | | -26.4882 | | <0.01 | | -1.6882 | | -1.4555 | |
| 2/3year university | -2.3981 | .0749 | | -32.0168 | | <0.01 | | -2.5449 | | -2.2512 | |
| 4year university | -2.6601 | .0625 | | -42.5690 | | <0.01 | | -2.7826 | | -2.5379 | |
| Family History  High Blood pressure(NO=0) | |  | |  | |  | |  | |  | |
| YES | -.2482 | .0468 | | -5.3048 | | <0.01 | | -.3399 | | -.1565 | |
| Hyperlipidemia(NO=0) | |  | |  | |  | |  | |  | |
| YES | .0105 | .0880 | | .1198 | |  | | -.1620 | | .1831 | |
| Ischemic heart disease(NO=0) | |  | |  | |  | |  | |  | |
| YES | -.0304 | .0969 | | -.3143 | |  | | -.2203 | | .1594 | |
| Stroke(NO=0) |  |  | |  | |  | |  | |  | |
| YES | .0181 | .0728 | | .2493 | |  | | -.1245 | | .1608 | |
| Diabetes(NO=0) |  |  | |  | |  | |  | |  | |
| YES | .1191 | .0576 | | 2.0666 | | <0.5 | | .0061 | | .2321 | |
| Number of eating out | .0552 | .0131 | | 4.2325 | | <0.01 | | .0297 | | .0808 | |
| Smoking | -.1983 | .0460 | | -4.3104 | | <0.01 | | -.2884 | | -.1081 | |
| **Number of eatung out**  *** smoking** | -.0154 | .0103 | | -1.4968 | |  | | -.0356 | | .0048 | |

<Table 7>Moderating Effect of Drinking

|  | B | SE | t | p | 95% Confidence interval | |
| --- | --- | --- | --- | --- | --- | --- |
| LLCI | ULCI | |
| (Constant variable) | 4.4761 | .1299 | 34.4684 | <.001 | 4.2215 | 4.7307 | |
| Gender(Women=0) |  |  |  |  |  |  | |
| Men | .0973 | .0411 | 2.3645 | <0.5 | .0166 | .1779 | |
| Age(over 70s=0) |  |  |  |  |  |  | |
| under 30s | .5874 | .1187 | 4.9486 | <.001 | .3547 | .8200 | |
| 30s | -.4973 | .0951 | -5.2273 | <.001 | -.6838 | -.3108 | |
| 40s | -.4832 | .0900 | -5.3709 | <.001 | -.6596 | -.3068 | |
| 50s | -.2539 | .0820 | -3.0974 | <.01 | -.4146 | -.0932 | |
| 60s | -.0877 | .0739 | -1.1873 | <.001 | -.2326 | .0571 | |
| Number of families(over 4=0) | | |  |  |  |  | |
| 1 | -.8308 | .0762 | -10.9026 | <.001 | -.9801 | -.6814 | |
| 2 | -.4887 | .0570 | -8.5705 | <.001 | -.6005 | -.3770 | |
| 3 | -.2125 | .0513 | -4.1396 | <.001 | -.3131 | -.1119 | |
| Marital status(Unmarried=0) | | |  |  |  |  | |
| Married | -.6879 | .0868 | -7.9255 | <.001 | -.8580 | -.5177 | |
| Education(Guitar=0) | | |  |  |  |  | |
| Elementary school | -.7895 | .0790 | -9.9921 | <.001 | -.9444 | -.6765 | |
| Middle school | -.8224 | .0744 | -11.0501 | <.001 | -.9683 | -.6765 | |
| High school | -1.6566 | .0589 | -33.4692 | <.001 | -1.7720 | -1.5412 | |
| 2/3year university | -2.4908 | .0744 | -44.2364 | <.001 | -2.6367 | -2.3449 | |
| 4year university | -2.7416 | .0620 | -5.3775 | <.001 | -2.8631 | -2.6201 | |
| Family History  High Blood pressure(NO=0) | |  |  |  |  |  | |
| YES | -.2526 | .0470 | .3725 | <.001 | -.3447 | -.1605 | |
| Hyperlipidemia(NO=0) | |  |  |  |  |  | |
| YES | .0329 | .0884 | -.4592 |  | -.1403 | .2062 | |
| Ischemic heart disease(NO=0) | |  |  |  |  |  | |
| YES | -.0447 | .0972 | .2005 |  | -.2353 | .1460 | |
| Stroke(NO=0) |  |  |  |  |  |  | |
| YES | .0147 | .0731 | 1.7713 |  | -.1286 | .1579 | |
| Diabetes(NO=0) |  |  |  |  |  |  | |
| YES | .1025 | .0579 | 6.1845 |  | -.0109 | .2159 | |
| Number of eating out | .0896 | .0145 | 5.1281 | <.001 | .0612 | .1180 | |
| Drinking | .1475 | .0288 | -5.1616 | <.001 | .0911 | .2039 | |
| **Number of eating out**  *** Drinking** | -.0358 | .0069 | -2.3645 | <.001 | -.0494 | -.0222 | |
|  | | | | | | |

<Table 8> Moderating Effect of Stress recognition rate

|  | B | SE | t | p | 95% Confidence interval | |
| --- | --- | --- | --- | --- | --- | --- |
| LLCI | ULCI | |
| (Constant variable) | 4.6544 | .1333 | 34.9289 |  | 4.3932 | 4.9156 | |
| Gender(Women=0) |  |  |  |  |  |  | |
| Men | .0854 | .0399 | 2.1389 | <0.5 | .0071 | .1637 | |
| Age(over 70s=0) |  |  |  |  |  |  | |
| under 30s | .6301 | .1178 | 5.3499 | <0.01 | .3992 | .8610 | |
| 30s | -.3806 | .0940 | -4.0499 |  | -.5649 | -.1964 | |
| 40s | -.3990 | .0887 | -4.5005 | <0.01 | -.5728 | -.2252 | |
| 50s | -.1985 | .0810 | -2.4507 | <0.5 | -.3573 | -.0397 | |
| 60s | -.0686 | .0731 | -.9387 |  | -.2118 | .0746 | |
| Number of families(over 4=0) | | |  |  |  |  | |
| 1 | -.7952 | .0756 | -10.5176 | <0.01 | -.9434 | -.6470 | |
| 2 | -.4526 | .0565 | -8.0155 | <0.01 | -.5633 | -.3419 | |
| 3 | -.1909 | .0509 | -3.7521 | <0.01 | -.2906 | -.0911 | |
| Marital status(Unmarried=0) | | |  |  |  |  | |
| Married | -.6510 | .0861 | -7.5601 | <0.01 | -.8198 | -.4822 | |
| Education(Guitar=0) | |  |  |  |  |  | |
| Elementary school | -.6114 | .0797 | -7.6700 | <0.01 | -.7377 | -.4551 | |
| Middle school | -.6048 | .0758 | -7.9754 | <0.01 | -.7535 | -.4561 | |
| High school | -1.4366 | .0612 | -23.4665 | <0.01 | -1.5566 | -1.3166 | |
| 2/3year university | -2.2737 | .0762 | -29.8367 | <0.01 | -2.4231 | -2.1243 | |
| 4year university | -2.5221 | .0644 | -39.1910 | <0.01 | -2.6482 | -2.3959 | |
| Family History |  |  |  |  |  |  | |
| High Blood pressure(NO=0) | |  |  |  |  |  | |
| YES | -.2245 | .0467 | -4.8100 | <0.01 | -.3161 | -.1330 | |
| Hyperlipidemia(NO=0) | |  |  |  |  |  | |
| YES | .0652 | .0877 | .7435 |  | -.1068 | .2372 | |
| Ischemic heart disease(NO=0) | |  |  |  |  |  | |
| YES | -.0216 | .0965 | -.2238 |  | -.2108 | .1676 | |
| Stroke(NO=0) |  |  |  |  |  |  | |
| YES | .0326 | .725 | .4498 |  | -.1095 | .1748 | |
| Diabetes(NO=0) |  |  |  |  |  |  | |
| YES | .1208 | .0574 | 2.1033 |  | .0082 | .2333 | |
| Number of eating out | .0618 | .0167 | 3.6936 | <0.01 | .0290 | .0946 | |
| Stree recognition rate | -.2846 | .0507 | -5.6116 | <0.01 | -.3840 | -.1852 | |
| **Number of eating out** *  **Stress recognition rate** | -.0149 | .0120 | -1.2346 | <0.01 | -.0385 | -.0087 | |
|  | | | | | | |
